# Supplementary material for: Monodisperse CoSn2 and FeSn2 nanocrystals as high-performance anode materials for lithium-ion batteries
Source: Royal Society of Chemistry journal article supplement (doi:10.1039/c7nr08261d), 2018-01-01
Supplement: c7nr08261d1.pdf [file c7nr08261d1.pdf]

## Supporting Information for

### **Monodisperse CoSn<sub>2</sub> and FeSn<sub>2</sub> nanocrystals as high-performance anode materials for lithium-ion batteries**

Shutao Wang, ‡<sup>a,b</sup> Meng He, ‡<sup>a,b</sup> Marc Walter,<sup>a,b</sup> Frank Krumeich,<sup>a</sup>  
Kostiantyn V. Kravchyk,<sup>a,b</sup> and Maksym V. Kovalenko\*<sup>a,b</sup>

S. Wang, M. He, M. Walter, Dr. K.V. Kravchyk, Dr. F. Krumeich, Prof. Dr. M. V. Kovalenko

[a] Department of Chemistry and Applied Biosciences

ETH Zürich – Swiss Federal Institute of Technology Zürich

Vladimir Prelog Weg 1, 8093 Zürich (Switzerland)

and

[b] Empa-Swiss Federal Laboratories for Materials Science and Technology

Laboratory for thin films and photovoltaics

Überlandstrasse 129, 8600 Dübendorf, (Switzerland)

‡ These authors contributed equally.

[\*] Prof. Dr. Maksym V. Kovalenko

E-mail: mvkovalenko@ethz.ch

## Materials and Methods

### I. Materials

**Chemicals and solvents.** Cobalt (II) chloride (99.99%, Aldrich), tin (II) chloride (anhydrous, ABCR), lithium diisopropylamide ( $\text{LiN}(\text{iPr})_2$ , 97%, Sigma-Aldrich), lithium bis(trimethylsilyl)amide ( $\text{LiN}(\text{SiMe}_3)_2$ , 97 %, Sigma-Aldrich), oleic acid (OA, 90%, Aldrich), toluene (99.9%, Sigma-Aldrich), ethanol ( $\geq 99.9\%$ , Scharlau), hydrazine (Gerling Holz+Co) and acetonitrile (Sigma-Aldrich) were used as received. Oleylamine (OLA, 90%, ACROS) was dried prior to use at 100 °C under vacuum overnight.

**Battery components.** Carbon black (Super C65, TIMCAL), carboxymethyl cellulose (CMC, Grade: 2200, lot No. B1118282, Daicel Fine Chem Ltd.), 1M solution of  $\text{LiPF}_6$  in ethylene carbonate/dimethyl carbonate (EC/DMC, Novolyte), 4-fluoro-1,3-dioxolan-2-one (FEC,  $>98.0\%$ , TCI), Celgard separator (Celgard 2320, 20 $\mu\text{m}$  microporous trilayer membrane PP/PE/PP, Celgard Inc. USA).

### II. Methods

**Synthesis of  $\text{CoSn}_2$  NCs.** In a typical synthesis of *ca.* 10 nm  $\text{CoSn}_2$  NCs, dried OLA (13 mL) was mixed with  $\text{CoCl}_2$  (0.033 g, 0.25 mmol) in a 50-mL three neck flask, and then additionally dried under vacuum (45 minutes at 120 °C), heated to 270°C under nitrogen, followed by the injection of  $\text{LiN}(\text{iPr})_2$  solution (3.6 mmol, 0.38 g, in 2 mL of OLA) and, after 30s, 0.5 mmol of  $\text{SnCl}_2$  (0.095 g, in 3 mL of OLA). The reaction mixture was held for 4 h at this temperature. Finally, the reaction was quickly quenched by the combined effect of the cooling with an ice-water bath together with the injection of anhydrous toluene (12 mL) into a crude solution at around 150 °C. Upon cooling, oleic acid (0.4 mL) was added at around 50 °C. After cooling,  $\text{CoSn}_2$  NCs were precipitated by adding ethanol (60 mL), followed by centrifugation at 8500 rpm for 4 min. Then  $\text{CoSn}_2$  NCs were redispersed in toluene (12 mL) containing oleic acid (0.25 mL), and then precipitated by ethanol (12 mL) and centrifuged at 8000 rpm for 1 min. Finally,  $\text{CoSn}_2$  NCs were dispersed in common nonpolar solvents such as chloroform or toluene and stored in the fridge.

**Table S1.** Experimental conditions for CoSn<sub>2</sub> NCs synthesis.

| # | OLA, mL | CoCl <sub>2</sub> , mmol | T(inj), °C | LiN(iPr) <sub>2</sub> , mmol | SnCl <sub>2</sub> , mmol | Reaction time, h | Mean size, nm | S, % |
|---|---------|--------------------------|------------|------------------------------|--------------------------|------------------|---------------|------|
| 1 | 13      | 0.25                     | 210        | 3.6                          | 0.5                      | 4                | 5             | 9.93 |
| 2 | 13      | 0.25                     | 270        | 3.6                          | 0.5                      | 4                | 13            | 9.6  |

**Synthesis of FeSn<sub>2</sub> NCs.** In a typical synthesis of *ca.* 12 nm FeSn<sub>2</sub> NCs, dried OLA (12 mL) was mixed with of FeCl<sub>2</sub> (0.021 g, 0.167 mmol) in a 50-mL three neck flask, additionally dried under vacuum (45 minutes at 120 °C), heated to 330 °C under nitrogen, followed by the injection of LiN(iPr)<sub>2</sub> solution (3.6 mmol, 0.38 g, in 2 mL of OLA) and, after 30s, 0.25 mmol of SnCl<sub>2</sub> (0.048 g, in 3 mL of OLA). The reaction mixture was held for 15 min at this temperature. Finally, the reaction was quickly quenched by cooling with an ice-water bath together with the injection of anhydrous toluene (12 mL) at around 150 °C. Upon cooling, oleic acid (0.4 mL) was added at around 50°C. After cooling, FeSn<sub>2</sub> NCs were precipitated by adding ethanol (~60 mL), followed by centrifugation at 8500 rpm for 4 min. Then FeSn<sub>2</sub> NCs were redispersed in toluene (12 mL) containing oleic acid (0.25 mL), and then precipitated by ethanol (12 mL) and centrifuged at 8000 rpm for 1 min. Finally, FeSn<sub>2</sub> NCs were dispersed in common nonpolar solvents such as chloroform or toluene and stored in the fridge.

**Synthesis of Sn nanoparticles.** Sn NCs were synthesized and purified according to the previously published procedure of Kravchyk *et al.* [*J. Am. Chem. Soc.*, 2013, **135**, 4199-4202.].

**Ligand removal.** In order to remove the organic capping ligands, NCs were precipitated with ethanol, centrifuged and redispersed in a solution of 0.8 mL hydrazine in 25 mL anhydrous acetonitrile. The suspension was stirred at room temperature for 2 h. After centrifugation (8000 rpm, 4 min), the precipitate was washed three times with acetonitrile (20 mL) to remove residual hydrazine. Finally, NCs were separated from the solution by centrifugation (8000 rpm, 4 min) and dried for 12 h at room temperature under vacuum.

**Assembly and testing of Li-ion half cells.** Electrodes were prepared as follows: the respective NCs after ligand removal, carbon black, and CMC binder were mixed in the weight ratio of

64:21:15 for 1 h by ball-milling with deionized water as solvent. Carbon black (Super C65, TIMCAL) was used as a conductive additive. The slurry was coated onto Cu foil. The current collectors were dried at room temperature for 12 h and then for 12 h under vacuum at 80°C. Coin-type cells were assembled in an argon-filled glove box ( $O_2 < 0.1$  ppm,  $H_2O < 0.1$  ppm) using one layer of Celgard separator. For assembling Li-ion batteries, a Li foil was used as the counter and reference electrode. A solution of 1 M  $LiPF_6$  in ethylene carbonate (EC)/dimethyl carbonate (DMC) (1:1 in volume) was used as electrolyte. To improve cycling stability 3% of FEC were added to electrolyte. The charge/discharge cycling measurements were performed by a Lanhe (Wuhan, China) battery tester with the potential range 0.005-2.0V vs.  $Li^+/Li$ . The loading of active materials was  $\sim 0.5$  mg  $cm^{-2}$ . The obtained capacities were normalized to the mass of NCs.

### III. Characterization

**Material characterization.** Transmission Electron Microscopy (TEM) images were obtained using a Philips CM30 TEM microscope at 300 kV. High resolution TEM images were measured on a JEOL 2200FS at 200 kV. Carbon-coated TEM grids (Ted-Pella) were used as substrates. Average size and size distribution (% FWHM of the Gaussian fit to size-histogram) are obtained from TEM images by counting at least 100 NCs using Nano Measurer software (<http://nanomeasurer.software.informer.com>). Powder X-ray diffraction (XRD) was measured on a STOE STADI P powder X-ray diffractometer. EDX elemental analysis was performed using Hitachi S-4800 SEM microscope.

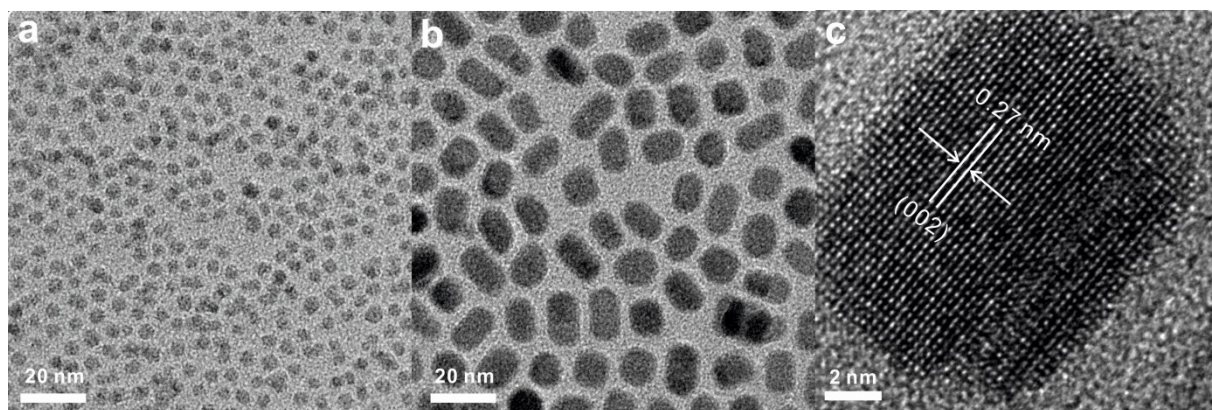

**Figure S1.** TEM images (a) 5 nm and (b) 13 nm CoSn<sub>2</sub> NCs. HR-TEM image of 13 nm CoSn<sub>2</sub> NCs.

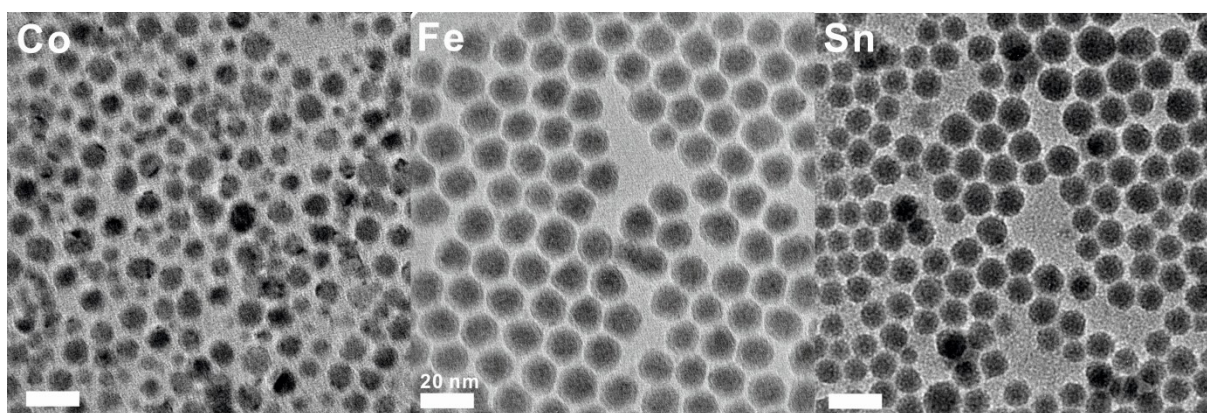

**Figure S2.** TEM images of Co, Fe and Sn NCs.

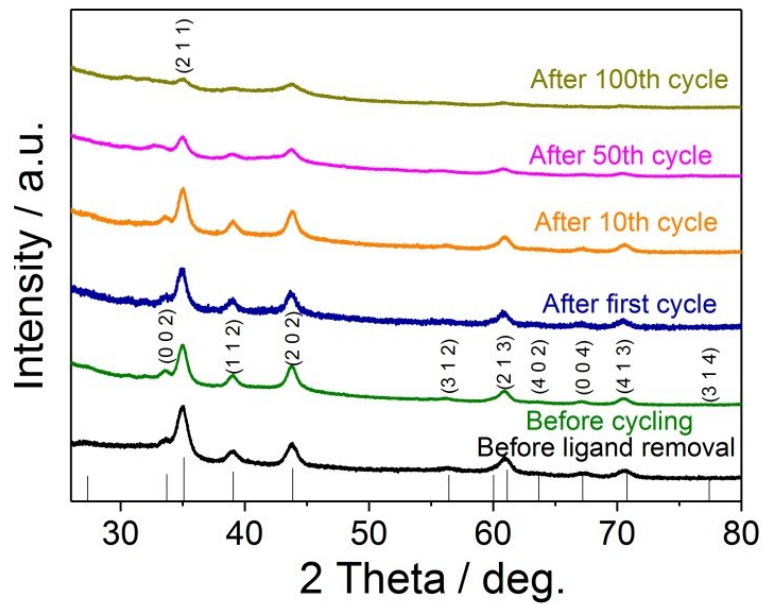

**Figure S3.** Ex-situ XRD patterns of FeSn<sub>2</sub> NCs before and after (charged FeSn<sub>2</sub> NCs) electrochemical cycling.

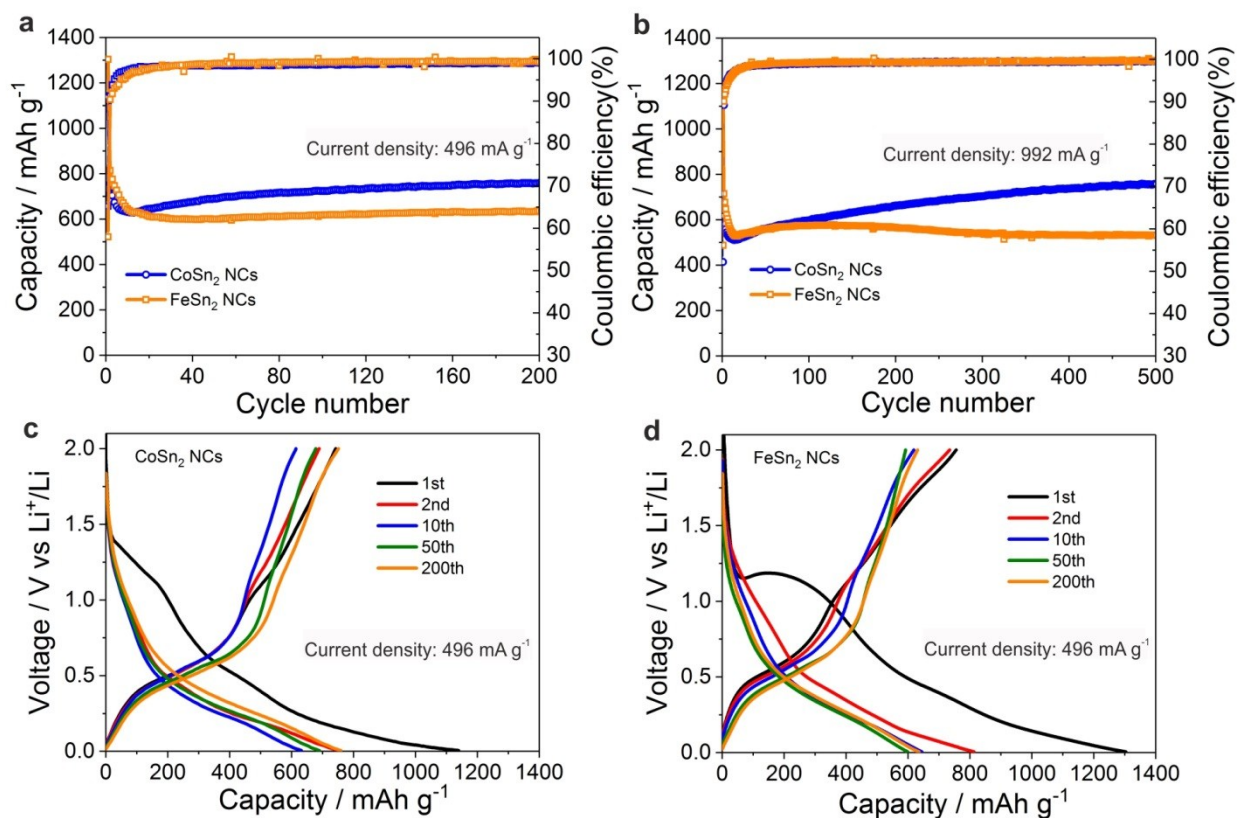

**Figure S4.** (a, b) Comparison of the cycling stability of Li-ion anodes composed of CoSn<sub>2</sub> and FeSn<sub>2</sub> NCs in Li-ion half-cells at current densities of 496 mA g<sup>-1</sup> and 992 mA g<sup>-1</sup>. (c, d) Galvanostatic discharge/charge voltage curves of CoSn<sub>2</sub> and FeSn<sub>2</sub> NCs measured at current density of 496 mA g<sup>-1</sup>. All cells were cycled at room temperature in the potential range 0.005–2.0 V vs. Li<sup>+</sup>/Li.

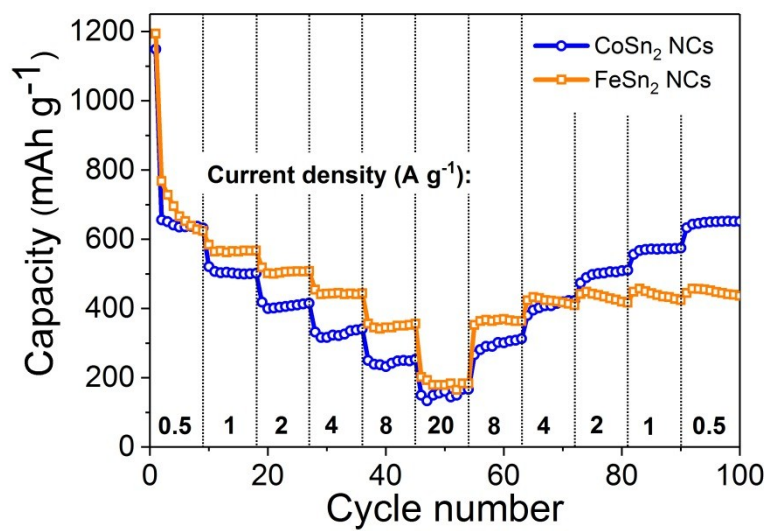

**Figure S5.** Rate capability tests of Li-ion anodes composed of CoSn<sub>2</sub> and FeSn<sub>2</sub> NCs at current density of 0.5-20 A g<sup>-1</sup>.
